# Supplementary material for: Towards More Comprehensive Projections of Urban Heat-Related Mortality: Estimates for New York City under Multiple Population, Adaptation, and Climate Scenarios
Source: PubMed Central journal article supplement (PMC5226693; doi:10.1289/ehp166), 2016-06-23
Supplement: EHP166.s001.acco.pdf [file EHP166.s001.acco.pdf]

**Note to readers with disabilities:** *EHP* strives to ensure that all journal content is accessible to all readers. However, some figures and Supplemental Material published in *EHP* articles may not conform to [508 standards](#) due to the complexity of the information being presented. If you need assistance accessing journal content, please contact [ehp508@niehs.nih.gov](mailto:ehp508@niehs.nih.gov). Our staff will work with you to assess and meet your accessibility needs within 3 working days.

## **Supplemental Material**

# **Towards More Comprehensive Projections of Urban Heat-Related Mortality: Estimates for New York City under Multiple Population, Adaptation, and Climate Scenarios**

Elisaveta P. Petkova, Jan K. Vink, Radley M. Horton, Antonio Gasparrini, Daniel A. Bader, Joe D. Francis, and Patrick L. Kinney

### **Table of Contents**

**Table S1.** Population scenarios and corresponding mortality rates used in this study.

**Table S1** Population scenarios and corresponding mortality rates used in this study.

| YEAR | TOTAL POPULATION            |                                        |                                           |                                            |                             | ANNUAL MORTALITY RATES PER 100,000 POPULATION |                                        |                                           |                                            |                             |
|------|-----------------------------|----------------------------------------|-------------------------------------------|--------------------------------------------|-----------------------------|-----------------------------------------------|----------------------------------------|-------------------------------------------|--------------------------------------------|-----------------------------|
|      | <i>Baseline<sup>a</sup></i> | <i>Decreased Mortality<sup>b</sup></i> | <i>Increased In-Migration<sup>c</sup></i> | <i>Increased Out-Migration<sup>d</sup></i> | <i>Constant<sup>e</sup></i> | <i>Baseline<sup>a</sup></i>                   | <i>Decreased Mortality<sup>b</sup></i> | <i>Increased In-Migration<sup>c</sup></i> | <i>Increased Out-Migration<sup>d</sup></i> | <i>Constant<sup>e</sup></i> |
| 2010 | 8175133                     | 8175133                                | 8175133                                   | 8175133                                    | 8175133                     | 652                                           | 650                                    | 652                                       | 652                                        | 652                         |
| 2011 | 8238516                     | 8238709                                | 8240542                                   | 8237833                                    | 8175133                     | 663                                           | 658                                    | 662                                       | 663                                        | 652                         |
| 2012 | 8299751                     | 8300330                                | 8305808                                   | 8297714                                    | 8175133                     | 673                                           | 667                                    | 673                                       | 674                                        | 652                         |
| 2013 | 8358916                     | 8360053                                | 8370952                                   | 8354845                                    | 8175133                     | 684                                           | 674                                    | 683                                       | 684                                        | 652                         |
| 2014 | 8416212                     | 8418107                                | 8436143                                   | 8409457                                    | 8175133                     | 694                                           | 682                                    | 692                                       | 694                                        | 652                         |
| 2015 | 8471895                     | 8474727                                | 8501573                                   | 8461805                                    | 8175133                     | 703                                           | 690                                    | 701                                       | 704                                        | 652                         |
| 2016 | 8525758                     | 8529698                                | 8566979                                   | 8511698                                    | 8175133                     | 712                                           | 697                                    | 710                                       | 713                                        | 652                         |
| 2017 | 8577624                     | 8582850                                | 8632145                                   | 8558967                                    | 8175133                     | 722                                           | 704                                    | 719                                       | 723                                        | 652                         |
| 2018 | 8627530                     | 8634209                                | 8697063                                   | 8603663                                    | 8175133                     | 732                                           | 712                                    | 727                                       | 733                                        | 652                         |
| 2019 | 8675385                     | 8683689                                | 8761587                                   | 8645717                                    | 8175133                     | 742                                           | 720                                    | 737                                       | 744                                        | 652                         |
| 2020 | 8721390                     | 8731487                                | 8825880                                   | 8685346                                    | 8175133                     | 753                                           | 729                                    | 747                                       | 755                                        | 652                         |
| 2021 | 8765407                     | 8777459                                | 8889749                                   | 8722415                                    | 8175133                     | 764                                           | 737                                    | 757                                       | 766                                        | 652                         |
| 2022 | 8807304                     | 8821478                                | 8953018                                   | 8756805                                    | 8175133                     | 776                                           | 747                                    | 767                                       | 778                                        | 652                         |
| 2023 | 8847177                     | 8863632                                | 9015724                                   | 8788634                                    | 8175133                     | 787                                           | 755                                    | 777                                       | 789                                        | 652                         |
| 2024 | 8885095                     | 8904000                                | 9077902                                   | 8817986                                    | 8175133                     | 799                                           | 765                                    | 787                                       | 801                                        | 652                         |
| 2025 | 8921033                     | 8942541                                | 9139465                                   | 8844840                                    | 8175133                     | 810                                           | 774                                    | 797                                       | 813                                        | 652                         |
| 2026 | 8955053                     | 8979326                                | 9200435                                   | 8869289                                    | 8175133                     | 822                                           | 784                                    | 808                                       | 826                                        | 652                         |
| 2027 | 8987124                     | 9014321                                | 9260734                                   | 8891300                                    | 8175133                     | 835                                           | 794                                    | 819                                       | 839                                        | 652                         |
| 2028 | 9017255                     | 9047537                                | 9320328                                   | 8910900                                    | 8175133                     | 847                                           | 804                                    | 829                                       | 851                                        | 652                         |
| 2029 | 9045059                     | 9078585                                | 9378773                                   | 8927697                                    | 8175133                     | 860                                           | 814                                    | 840                                       | 864                                        | 652                         |
| 2030 | 9070840                     | 9107764                                | 9436322                                   | 8941997                                    | 8175133                     | 872                                           | 824                                    | 851                                       | 878                                        | 652                         |
| 2031 | 9094849                     | 9135329                                | 9492240                                   | 8954104                                    | 8175133                     | 886                                           | 836                                    | 863                                       | 892                                        | 652                         |

|             |         |         |          |         |         |      |     |     |      |     |
|-------------|---------|---------|----------|---------|---------|------|-----|-----|------|-----|
| <b>2032</b> | 9117093 | 9161272 | 9546449  | 8964009 | 8175133 | 899  | 847 | 874 | 906  | 652 |
| <b>2033</b> | 9137532 | 9185551 | 9598910  | 8971675 | 8175133 | 911  | 856 | 884 | 918  | 652 |
| <b>2034</b> | 9156274 | 9208290 | 9649722  | 8977270 | 8175133 | 923  | 865 | 893 | 930  | 652 |
| <b>2035</b> | 9173495 | 9229616 | 9699028  | 8980940 | 8175133 | 933  | 873 | 901 | 940  | 652 |
| <b>2036</b> | 9189405 | 9249750 | 9747035  | 8982920 | 8175133 | 942  | 880 | 909 | 950  | 652 |
| <b>2037</b> | 9204070 | 9268746 | 9793792  | 8983284 | 8175133 | 951  | 887 | 916 | 960  | 652 |
| <b>2038</b> | 9217617 | 9286727 | 9839423  | 8982187 | 8175133 | 960  | 894 | 923 | 969  | 652 |
| <b>2039</b> | 9230091 | 9303731 | 9883955  | 8979663 | 8175133 | 969  | 901 | 930 | 978  | 652 |
| <b>2040</b> | 9241489 | 9319745 | 9927365  | 8975731 | 8175133 | 976  | 906 | 936 | 986  | 652 |
| <b>2041</b> | 9251864 | 9334821 | 9969700  | 8970459 | 8175133 | 983  | 911 | 941 | 993  | 652 |
| <b>2042</b> | 9261278 | 9349010 | 10011018 | 8963915 | 8175133 | 989  | 916 | 946 | 1000 | 652 |
| <b>2043</b> | 9269889 | 9362449 | 10051431 | 8956269 | 8175133 | 994  | 919 | 950 | 1006 | 652 |
| <b>2044</b> | 9277759 | 9375207 | 10090994 | 8947607 | 8175133 | 1000 | 923 | 954 | 1012 | 652 |
| <b>2045</b> | 9284976 | 9387365 | 10129789 | 8938033 | 8175133 | 1004 | 925 | 957 | 1016 | 652 |
| <b>2046</b> | 9291622 | 9398996 | 10167893 | 8927644 | 8175133 | 1007 | 927 | 959 | 1020 | 652 |
| <b>2047</b> | 9297761 | 9410160 | 10205342 | 8916493 | 8175133 | 1011 | 929 | 962 | 1024 | 652 |
| <b>2048</b> | 9303433 | 9420886 | 10242175 | 8904659 | 8175133 | 1014 | 930 | 964 | 1027 | 652 |
| <b>2049</b> | 9308625 | 9431151 | 10278357 | 8892114 | 8175133 | 1016 | 931 | 966 | 1031 | 652 |
| <b>2050</b> | 9313369 | 9440993 | 10313920 | 8878911 | 8175133 | 1018 | 931 | 967 | 1032 | 652 |
| <b>2051</b> | 9317783 | 9450544 | 10348974 | 8865197 | 8175133 | 1019 | 931 | 967 | 1034 | 652 |
| <b>2052</b> | 9321906 | 9459819 | 10383544 | 8851010 | 8175133 | 1020 | 931 | 968 | 1036 | 652 |
| <b>2053</b> | 9325826 | 9468910 | 10417712 | 8836440 | 8175133 | 1022 | 931 | 969 | 1038 | 652 |
| <b>2054</b> | 9329481 | 9477757 | 10451402 | 8821437 | 8175133 | 1025 | 932 | 971 | 1040 | 652 |
| <b>2055</b> | 9332831 | 9486325 | 10484576 | 8805989 | 8175133 | 1026 | 932 | 972 | 1042 | 652 |
| <b>2056</b> | 9335894 | 9494642 | 10517243 | 8790111 | 8175133 | 1027 | 931 | 973 | 1043 | 652 |
| <b>2057</b> | 9338741 | 9502772 | 10549459 | 8773891 | 8175133 | 1028 | 930 | 974 | 1045 | 652 |

|             |         |         |          |         |         |      |     |      |      |     |
|-------------|---------|---------|----------|---------|---------|------|-----|------|------|-----|
| <b>2058</b> | 9341456 | 9510800 | 10581307 | 8757412 | 8175133 | 1029 | 930 | 975  | 1046 | 652 |
| <b>2059</b> | 9344020 | 9518696 | 10612754 | 8740664 | 8175133 | 1032 | 930 | 976  | 1048 | 652 |
| <b>2060</b> | 9346395 | 9526449 | 10643766 | 8723626 | 8175133 | 1034 | 930 | 978  | 1050 | 652 |
| <b>2061</b> | 9348520 | 9533991 | 10674329 | 8706244 | 8175133 | 1036 | 931 | 980  | 1053 | 652 |
| <b>2062</b> | 9350392 | 9541313 | 10704452 | 8688518 | 8175133 | 1038 | 932 | 983  | 1055 | 652 |
| <b>2063</b> | 9351992 | 9548412 | 10734106 | 8670448 | 8175133 | 1041 | 932 | 985  | 1058 | 652 |
| <b>2064</b> | 9353286 | 9555243 | 10763252 | 8651992 | 8175133 | 1044 | 933 | 988  | 1061 | 652 |
| <b>2065</b> | 9354309 | 9561832 | 10791907 | 8633189 | 8175133 | 1047 | 934 | 991  | 1064 | 652 |
| <b>2066</b> | 9355007 | 9568146 | 10820021 | 8614023 | 8175133 | 1049 | 935 | 993  | 1066 | 652 |
| <b>2067</b> | 9355461 | 9574235 | 10847659 | 8594561 | 8175133 | 1051 | 935 | 995  | 1068 | 652 |
| <b>2068</b> | 9355685 | 9580136 | 10874853 | 8574832 | 8175133 | 1052 | 935 | 997  | 1069 | 652 |
| <b>2069</b> | 9355708 | 9585856 | 10901614 | 8554869 | 8175133 | 1054 | 935 | 999  | 1071 | 652 |
| <b>2070</b> | 9355566 | 9591414 | 10927984 | 8534707 | 8175133 | 1055 | 934 | 1000 | 1071 | 652 |
| <b>2071</b> | 9355290 | 9596846 | 10953987 | 8514390 | 8175133 | 1055 | 933 | 1001 | 1071 | 652 |
| <b>2072</b> | 9354935 | 9602203 | 10979675 | 8493968 | 8175133 | 1055 | 931 | 1001 | 1071 | 652 |
| <b>2073</b> | 9354541 | 9607530 | 11005096 | 8473499 | 8175133 | 1055 | 930 | 1002 | 1071 | 652 |
| <b>2074</b> | 9354144 | 9612840 | 11030284 | 8453014 | 8175133 | 1054 | 928 | 1002 | 1070 | 652 |
| <b>2075</b> | 9353765 | 9618152 | 11055246 | 8432517 | 8175133 | 1054 | 926 | 1002 | 1069 | 652 |
| <b>2076</b> | 9353405 | 9623494 | 11080008 | 8412056 | 8175133 | 1053 | 924 | 1002 | 1068 | 652 |
| <b>2077</b> | 9353110 | 9628889 | 11104603 | 8391647 | 8175133 | 1052 | 921 | 1002 | 1067 | 652 |
| <b>2078</b> | 9352922 | 9634378 | 11129069 | 8371325 | 8175133 | 1051 | 919 | 1002 | 1065 | 652 |
| <b>2079</b> | 9352842 | 9639977 | 11153430 | 8351130 | 8175133 | 1049 | 916 | 1002 | 1064 | 652 |
| <b>2080</b> | 9352876 | 9645697 | 11177693 | 8331045 | 8175133 | 1048 | 913 | 1001 | 1062 | 652 |
| <b>2081</b> | 9353015 | 9651530 | 11201852 | 8311075 | 8175133 | 1047 | 911 | 1001 | 1061 | 652 |
| <b>2082</b> | 9353268 | 9657484 | 11225923 | 8291215 | 8175133 | 1046 | 908 | 1001 | 1059 | 652 |
| <b>2083</b> | 9353616 | 9663551 | 11249877 | 8271464 | 8175133 | 1045 | 906 | 1001 | 1058 | 652 |

|      |         |         |          |         |         |      |     |      |      |     |
|------|---------|---------|----------|---------|---------|------|-----|------|------|-----|
| 2084 | 9354054 | 9669718 | 11273722 | 8251808 | 8175133 | 1045 | 903 | 1001 | 1057 | 652 |
| 2085 | 9354555 | 9675981 | 11297444 | 8232243 | 8175133 | 1044 | 901 | 1001 | 1056 | 652 |
| 2086 | 9355110 | 9682332 | 11321033 | 8212757 | 8175133 | 1044 | 899 | 1002 | 1055 | 652 |
| 2087 | 9355709 | 9688761 | 11344496 | 8193341 | 8175133 | 1044 | 897 | 1002 | 1055 | 652 |
| 2088 | 9356337 | 9695256 | 11367821 | 8173985 | 8175133 | 1043 | 894 | 1002 | 1054 | 652 |
| 2089 | 9356981 | 9701808 | 11390996 | 8154679 | 8175133 | 1043 | 892 | 1003 | 1054 | 652 |
| 2090 | 9357622 | 9708412 | 11414014 | 8135407 | 8175133 | 1043 | 891 | 1004 | 1053 | 652 |
| 2091 | 9358255 | 9715049 | 11436862 | 8116171 | 8175133 | 1044 | 889 | 1004 | 1053 | 652 |
| 2092 | 9358866 | 9721707 | 11459546 | 8096959 | 8175133 | 1044 | 887 | 1005 | 1053 | 652 |
| 2093 | 9359453 | 9728390 | 11482065 | 8077773 | 8175133 | 1044 | 885 | 1005 | 1053 | 652 |
| 2094 | 9360006 | 9735084 | 11504414 | 8058587 | 8175133 | 1045 | 884 | 1006 | 1053 | 652 |
| 2095 | 9360502 | 9741785 | 11526581 | 8039417 | 8175133 | 1045 | 882 | 1007 | 1053 | 652 |
| 2096 | 9360944 | 9748471 | 11548566 | 8020245 | 8175133 | 1046 | 881 | 1008 | 1053 | 652 |
| 2097 | 9361320 | 9755136 | 11570353 | 8001060 | 8175133 | 1046 | 879 | 1009 | 1053 | 652 |
| 2098 | 9361633 | 9761789 | 11591959 | 7981876 | 8175133 | 1047 | 877 | 1009 | 1053 | 652 |
| 2099 | 9361885 | 9768438 | 11613408 | 7962707 | 8175133 | 1047 | 876 | 1010 | 1052 | 652 |

Population scenarios:

- a) *Baseline*: assumed that all parameters of the model remain constant, that is age specific fertility and mortality rates and age characteristics of migration are all kept constant, but the population ages forward;
- b) *Decreased Mortality*: assumed a decrease in age specific mortality rates such that the values reach to 2/3 of the 2010 values by 2100;
- c) *Increased In-Migration*: assumed that the growth of the domestic in-migration (from other parts of the US to NYC) will be half of the growth of the US population and that the growth of the international in-migration (from outside of the US to NYC) will be half of the growth of the projected international in-migration nationwide;
- d) *Increased Out-Migration*: assumed that the rate of out-migration would increase by 25% over the projection period;
- e) *Constant*: assumed that population and age of the population remains constant at the 2010 level.
